# Supplementary material for: N-Glycosylation Patterns across the Age-Related Macular Degeneration Spectrum
Source: MDPI journal article supplement (doi:10.3390/molecules27061774), 2022-03-08
Supplement: s1 [file s1]

**Table S1.** Glycan measurements across the analysed groups, with pari-wise significance testing

| Glycan peak    | Bilateral AMD (B)        | Unilateral AMD (U)       | Early-onset drusen (e)   | Controls (c)             | P (F)         | Significance, pair-wise comparison |
|----------------|--------------------------|--------------------------|--------------------------|--------------------------|---------------|------------------------------------|
| Plasma glycans |                          |                          |                          |                          |               |                                    |
| GP1            | 0.17±0.07 (0.10-0.37)    | 0.18±0.06 (0.08-0.27)    | 0.12±0.06 (0.05-0.25)    | 0.17±0.12 (0.03-2.11)    | 0.438 (0.91)  |                                    |
| GP2            | 4.13±1.23 (1.90-7.14)    | 4.35±1.25 (3.01-6.37)    | 2.75±0.81 (1.59-4.66)    | 3.74±1.39 (1.06-12.65)   | 0.009 (3.84)  | ce 0.033; eU 0.036; eB 0.013       |
| GP3            | 2.14±0.37 (1.27-2.72)    | 2.34±0.33 (1.87-2.97)    | 2.00±0.30 (1.58-2.48)    | 2.09±0.46 (1.07-5.97)    | 0.318 (1.18)  |                                    |
| GP4            | 5.17±1.26 (2.87-7.22)    | 5.89±0.91 (4.62-7.82)    | 5.43±1.03 (3.64-7.29)    | 5.4±1.25 (1.99-11.07)    | 0.522 (0.75)  |                                    |
| GP5            | 2.34±0.35 (1.60-2.97)    | 2.29±0.30 (1.93-2.83)    | 2.53±0.44 (2.04-3.78)    | 2.42±0.43 (1.35-4.09)    | 0.459 (0.86)  |                                    |
| GP6            | 3.44±0.74 (2.13-4.91)    | 3.78±0.51 (3.27-4.85)    | 4.28±1.00 (2.82-6.41)    | 3.77±0.91 (1.49-7.39)    | 0.043 (2.72)  | eB 0.026                           |
| GP7            | 11.97±4.08 (8.32-26.34)  | 10.01±1.1 (8.17-11.42)   | 10.00±1.26 (8.14-13.15)  | 10.75±2.42 (6.53-29.18)  | 0.038 (2.82)  |                                    |
| GP8            | 8.8±1.19 (6.06-11.01)    | 9.42±0.87 (7.86-10.39)   | 10.43±2.10 (7.45-16.51)  | 9.41±1.55 (5.74-14.93)   | 0.016 (3.45)  | eB 0.008                           |
| GP9            | 37.78±2.68 (31.95-42.03) | 38.41±1.96 (34.71-40.52) | 38.02±2.52 (32.94-40.91) | 37.93±3.09 (22.64-50.5)  | 0.962 (0.10)  |                                    |
| GP10           | 7.26±1.5 (4.18-10.25)    | 6.74±1.25 (5.26-8.66)    | 7.53±1.24 (5.22-10.12)   | 7.32±1.59 (3.39-15.54)   | 0.676 (0.51)  |                                    |
| GP11           | 2.10±0.66 (1.15-4.21)    | 2.06±0.69 (1.24-3.19)    | 1.81±0.37 (1.39-2.71)    | 2.05±0.69 (0.81-5.7)     | 0.584 (0.65)  |                                    |
| GP12           | 1.61±0.41 (0.95-2.52)    | 1.71±0.49 (1.36-2.96)    | 1.87±0.72 (1.16-3.20)    | 1.8±0.53 (0.65-3.72)     | 0.306 (1.21)  |                                    |
| GP13           | 4.62±1.45 (1.82-7.47)    | 5.10±0.86 (3.74-6.29)    | 5.40±1.37 (3.28-7.97)    | 5.28±1.47 (0.59-11.18)   | 0.154 (1.75)  |                                    |
| GP14           | 7.19±1.72 (4.27-10.68)   | 6.40±0.89 (5.25-7.99)    | 6.34±1.28 (4.43-9.68)    | 6.46±1.44 (2.51-12.54)   | 0.094 (2.14)  |                                    |
| GP15           | 0.44±0.18 (0.10-0.84)    | 0.53±0.13 (0.39-0.79)    | 0.55±0.21 (0.21-0.89)    | 0.53±0.19 (0.06-1.51)    | 0.141 (1.82)  |                                    |
| GP16           | 0.83±0.40 (0.31-2.03)    | 0.80±0.34 (0.50-1.59)    | 0.95±0.34 (0.31-1.64)    | 0.87±0.31 (0.11-2.53)    | 0.656 (0.54)  |                                    |
| DG1            | 0.17±0.07 (0.10-0.37)    | 0.18±0.06 (0.08-0.27)    | 0.12±0.06 (0.05-0.25)    | 0.17±0.12 (0.03-2.11)    | 0.438 (0.91)  |                                    |
| DG2            | 4.13±1.23 (1.90-7.14)    | 4.35±1.25 (3.01-6.37)    | 2.75±0.81 (1.59-4.66)    | 3.74±1.39 (1.06-12.65)   | 0.009 (3.84)  | ce 0.033; eU 0.036; eB 0.013       |
| DG3            | 2.14±0.37 (1.27-2.72)    | 2.34±0.33 (1.87-2.97)    | 2.00±0.30 (1.58-2.48)    | 2.09±0.46 (1.07-5.97)    | 0.318 (1.18)  |                                    |
| DG4            | 5.17±1.26 (2.87-7.22)    | 5.89±0.91 (4.62-7.82)    | 5.43±1.03 (3.64-7.29)    | 5.4±1.25 (1.99-11.07)    | 0.522 (0.75)  |                                    |
| DG5            | 2.34±0.35 (1.60-2.97)    | 2.29±0.03 (1.93-2.83)    | 2.53±0.44 (2.04-3.78)    | 2.42±0.43 (1.35-4.09)    | 0.459 (0.86)  |                                    |
| DG6            | 3.44±0.74 (2.13-4.91)    | 3.78±0.51 (3.27-4.85)    | 4.28±1.00 (2.82-6.41)    | 3.77±0.91 (1.49-7.39)    | 0.043 (2.72)  | eB 0.026                           |
| DG7            | 11.97±4.08 (8.32-26.34)  | 10.01±1.1 (8.17-11.42)   | 10.00±1.26 (8.14-13.15)  | 10.75±2.42 (6.53-29.18)  | 0.038 (2.82)  |                                    |
| DG8            | 8.80±1.19 (6.06-11.01)   | 9.42±0.87 (7.86-10.39)   | 10.43±2.1 (7.45-16.51)   | 9.41±1.55 (5.74-14.93)   | 0.016 (3.45)  | eB 0.008                           |
| DG9            | 33.67±10.77 (5.22-42.03) | 34.32±11.63 (3.68-40.45) | 33.59±12.22 (3.66-40.91) | 33.46±11.68 (0.42-50.5)  | 0.996 (0.02)  |                                    |
| DG10           | 2.82±2.75 (0.82-8.92)    | 3.84±3.45 (0.87-8.66)    | 4.28±3.54 (1.03-10.12)   | 3.75±3.29 (0.54-13.83)   | 0.496 (0.80)  |                                    |
| DG11           | 2.25±0.60 (1.05-3.68)    | 2.41±0.42 (1.9-3.07)     | 2.20±0.47 (1.52-3.04)    | 2.36±0.57 (0.9-5.03)     | 0.496 (0.80)  |                                    |
| DG12           | 0.93±0.46 (0.42-2.29)    | 0.78±0.2 (0.36-1.06)     | 0.73±0.25 (0.39-1.14)    | 0.75±0.30 (0.1-2.46)     | 0.029 (3.03)  | cB 0.017                           |
| DG13           | 0.95±0.57 (0.32-2.30)    | 0.7±0.19 (0.34-0.97)     | 0.60±0.24 (0.28-1.15)    | 0.68±0.28 (0.18-1.95)    | <0.001 (7.75) | cB <0.001; eB 0.001                |
| Monosialo      | 24.69±4.13 (20.04-37.71) | 22.9±1.62 (20.5-25.53)   | 23.72±3.2 (19.47-31.43)  | 23.83±3.44 (11.88-42.36) | 0.512 (0.77)  |                                    |
| Disialo        | 57.38±2.65 (51.33-61.62) | 59.06±0.92 (58.02-60.88) | 58.18±2.03 (53.96-61.92) | 58.06±2.32 (47.4-67.67)  | 0.269 (1.31)  |                                    |
| Trisialo       | 14.88±2.48 (8.26-19.00)  | 15.21±1.6 (11.88-16.68)  | 14.8±1.7 (10.98-17.51)   | 14.84±2.08 (6.06-22.27)  | 0.962 (0.10)  |                                    |

|             |                          |                          |                          |                          |                |                                          |
|-------------|--------------------------|--------------------------|--------------------------|--------------------------|----------------|------------------------------------------|
| Tetrasialo  | 3.05±1.21 (0.91-6.56)    | 2.83±0.82 (1.5-4.14)     | 3.30±1.46 (1.01-6.17)    | 3.27±1.52 (0.64-12.99)   | 0.725 (0.44)   |                                          |
| BAMS        | 31.22±4.17 (25.57-43.14) | 29.77±1.29 (27.61-32.22) | 30.07±2.47 (26.82-34.76) | 30.27±3.15 (21.36-46.67) | 0.467 (0.85)   |                                          |
| BADS        | 71.43±4.93 (57.68-76.99) | 72.42±1.5 (70.55-75.33)  | 69.81±3.54 (63.11-75.71) | 71.2±4.00 (54.04-84.43)  | 0.438 (0.91)   |                                          |
| BA          | 79.87±3.41 (74.26-86.9)  | 79.81±1.87 (77-82.76)    | 79.95±2.5 (76.34-84.86)  | 79.88±2.61 (70.74-89.68) | 0.999 (0.01)   |                                          |
| TRIA        | 16.05±2.4 (10.08-19.7)   | 16.36±1.42 (13.79-18.31) | 16.47±2.04 (12.28-20.26) | 16.35±2.05 (8.79-24.34)  | 0.899 (0.20)   |                                          |
| TA          | 4.08±1.38 (2.31-8.20)    | 3.83±0.65 (2.94-4.79)    | 3.58±0.77 (2.38-5.02)    | 3.77±0.82 (1.54-7.38)    | 0.225 (1.46)   |                                          |
| C-FUC       | 21.64±4.53 (12.13-31.5)  | 21.47±3.32 (16.4-26.76)  | 24.61±5.45 (18.06-39.68) | 22.71±4.38 (10.43-36.42) | 0.167 (1.69)   |                                          |
| A-FUC       | 3.50±1.24 (1.79-6.51)    | 3.05±0.68 (2.18-4.04)    | 3.11±0.62 (2.14-4.59)    | 3.11±0.98 (1.43-11.05)   | 0.261 (1.34)   |                                          |
| A2          | 0.19±0.07 (0.12-0.40)    | 0.20±0.07 (0.1-0.3)      | 0.13±0.06 (0.07-0.25)    | 0.18±0.11 (0.04-2.01)    | 0.345 (1.11)   |                                          |
| G0          | 4.48±1.20 (2.23-7.38)    | 4.67±1.18 (3.41-6.76)    | 3.01±0.81 (1.77-4.83)    | 4.07±1.36 (1.39-12.84)   | 0.004 (4.42)   | ce 0.017; eU 0.023; UB 0.005             |
| G1          | 9.16±1.34 (6.45-11.67)   | 9.94±1.19 (8.18-12.36)   | 9.04±1.23 (7.19-11.39)   | 9.29±1.48 (5.00-19.19)   | 0.493 (0.80)   |                                          |
| G2          | 66.23±3.73 (58.56-78.22) | 65.2±2.03 (62.27-69.33)  | 67.89±2.25 (64.06-71.33) | 66.53±2.74 (56.43-79.18) | 0.110 (2.01)   |                                          |
| G3          | 13.42±2.54 (8.49-17.91)  | 13.21±1.21 (10.84-14.67) | 13.62±2.32 (9.64-17.8)   | 13.54±2.18 (6.24-22.54)  | 0.960 (0.10)   |                                          |
| G4          | 1.28±0.54 (0.41-2.69)    | 1.33±0.45 (0.91-2.38)    | 1.49±0.52 (0.52-2.53)    | 1.41±0.48 (0.32-3.29)    | 0.461 (0.86)   |                                          |
| IgG glycans |                          |                          |                          |                          |                |                                          |
| IgG_GP1     | 0.22±0.21 (0.05-1.06)    | 0.32±0.25 (0.08-0.75)    | 0.19±0.14 (0.05-0.55)    | 0.20±0.17 (0.02-1.55)    | 0.170 (1.68)   |                                          |
| IgG_GP2     | 0.96±0.32 (0.40-1.86)    | 1.16±0.71 (0.37-2.65)    | 0.60±0.25 (0.21-1.21)    | 0.88±0.58 (0.14-9.39)    | 0.060 (2.47)   |                                          |
| IgG_GP4     | 25.22±5.54 (13.66-39.43) | 22.52±4.02 (18.57-29.68) | 16.19±4.88 (6.93-23.3)   | 20.99±6.14 (6.48-47.89)  | <0.001 (9.69)  | ce 0.004; cB <0.001; eB <0.001           |
| IgG_GP3     | 0.12±0.02 (0.08-0.15)    | 0.11±0.05 (0.04-0.18)    | 0.08±0.01 (0.07-0.09)    | 0.10±0.03 (0.03-0.18)    | 0.049 (3.05)   |                                          |
| IgG_GP5     | 0.24±0.10 (0.10-0.56)    | 0.33±0.16 (0.15-0.69)    | 0.29±0.19 (0.08-0.92)    | 0.28±0.14 (0.07-1.64)    | 0.297 (1.23)   |                                          |
| IgG_GP6     | 6.58±1.60 (4.6-12.08)    | 6.37±1.35 (4.78-8.93)    | 4.43±1.10 (2.42-6.17)    | 5.61±1.63 (2.1-12.86)    | <0.001 (8.17)  | ce 0.010; cB 0.003; eU 0.019; eB <0.001  |
| IgG_GP7     | 0.70±0.36 (0.25-1.61)    | 0.9±0.47 (0.32-1.78)     | 0.59±0.28 (0.27-1.29)    | 0.72±0.42 (0.11-4.06)    | 0.323 (1.16)   |                                          |
| IgG_GP8     | 16.69±1.99 (13.57-20.33) | 15.84±2.17 (12.26-18.37) | 17.27±2.87 (11.4-22.98)  | 16.65±2.21 (0.52-22.65)  | 0.446 (0.89)   |                                          |
| IgG_GP9     | 8.22±1.04 (6.28-10.44)   | 8.08±1.19 (5.67-9.18)    | 8.36±1.65 (3.84-11.88)   | 8.16±1.4 (4.27-24.91)    | 0.923 (0.16)   |                                          |
| IgG_GP10    | 4.86±1.06 (2.96-7.59)    | 5.05±0.79 (4.16-6.57)    | 4.88±0.78 (3.73-6.48)    | 4.77±0.96 (2.57-8.63)    | 0.721 (0.45)   |                                          |
| IgG_GP11    | 0.75±0.13 (0.42-1.01)    | 0.88±0.17 (0.64-1.1)     | 0.74±0.19 (0.42-1.11)    | 0.75±0.17 (0.29-1.82)    | 0.159 (1.73)   |                                          |
| IgG_GP12    | 0.91±0.46 (0.22-2.15)    | 1.06±0.46 (0.54-1.95)    | 1.10±0.51 (0.49-2.36)    | 1.06±0.57 (0.10-3.91)    | 0.487 (0.81)   |                                          |
| IgG_GP13    | 0.26±0.17 (0.13-0.98)    | 0.3±0.11 (0.19-0.55)     | 0.26±0.08 (0.12-0.41)    | 0.26±0.13 (0.08-1.59)    | 0.807 (0.33)   |                                          |
| IgG_GP14    | 9.75±2.51 (4.81-17.54)   | 9.3±2.29 (6.84-13.72)    | 14.59±3.45 (8.74-20.94)  | 11.6±3.67 (3.39-25.82)   | <0.001 (8.50)  | ce 0.002; cB 0.018; eU 0.002; eB <0.001  |
| IgG_GP15    | 1.41±0.28 (0.76-2.31)    | 1.5±0.23 (1.14-1.8)      | 1.76±0.38 (1.14-2.49)    | 1.55±0.36 (0.75-3.54)    | 0.009 (3.85)   | eB 0.005                                 |
| IgG_GP16    | 3.21±0.52 (2.35-4.88)    | 3.29±0.25 (2.88-3.62)    | 3.26±0.36 (2.55-3.89)    | 3.16±0.50 (1.71-4.82)    | 0.644 (0.56)   |                                          |
| IgG_GP17    | 2.32±1.47 (0.67-7.21)    | 2.98±1.68 (1.44-5.88)    | 2.55±1.54 (0.59-5.80)    | 2.79±1.83 (0.46-13.61)   | 0.444 (0.89)   |                                          |
| IgG_GP18    | 7.69±1.63 (4.39-12.05)   | 7.2±1.51 (5.05-9.86)     | 11.27±2.65 (6.47-17.31)  | 9.07±2.53 (3.29-19.38)   | <0.001 (10.06) | ce 0.001; cB 0.008; eU <0.001; eB <0.001 |
| IgG_GP19    | 2.20±0.60 (1.44-3.81)    | 2.34±0.37 (2.06-3.22)    | 2.32±0.61 (1.50-3.92)    | 2.35±0.60 (1.12-9.03)    | 0.535 (0.73)   |                                          |
| IgG_GP20    | 0.53±0.28 (0.14-1.13)    | 0.89±0.66 (0.29-2.07)    | 0.61±0.51 (0.14-2.26)    | 0.62±0.45 (0.08-3.46)    | 0.199 (1.55)   |                                          |
| IgG_GP21    | 2.72±1.86 (0.45-7.40)    | 4.93±3.54 (1.95-12)      | 3.67±3.57 (0.48-15.60)   | 3.52±2.78 (0.39-22.46)   | 0.153 (1.76)   |                                          |

|          |                       |                       |                       |                        |              |
|----------|-----------------------|-----------------------|-----------------------|------------------------|--------------|
| IgG_GP22 | 0.30±0.16 (0.08-0.78) | 0.37±0.13 (0.22-0.61) | 0.30±0.23 (0.06-1.17) | 0.32±0.17 (0.04-1.46)  | 0.600 (0.62) |
| IgG_GP23 | 1.83±0.57 (0.86-3.43) | 1.79±0.34 (1.18-2.23) | 2.25±0.50 (1.31-3.32) | 2.07±0.63 (0.70-4.67)  | 0.040 (2.79) |
| IgG_GP24 | 2.41±0.84 (1.23-5.44) | 2.6±0.5 (2.12-3.81)   | 2.53±0.63 (1.25-3.60) | 2.59±0.79 (1.08-12.45) | 0.609 (0.61) |

pair-wise comparisons across groups, where B denotes bilateral group, U unilateral, e early-onset and c controls.
